# Supplementary material
Source: HighWire-hosted journal article supplement (https://erj.ersjournals.com/content/49/2/1601792)
Supplement: inline-supplementary-material-1 [file inline-supplementary-material-1.pdf]

## Search strategy

### PubMed

('CTEPH'[tw] OR 'chronic thromboembolic pulmonary hypertension'[tw] OR chronic thromboembolic pulmonary hypertens\*[tw] OR 'chronic thromboembolic pulmonary arterial hypertension'[tw] OR 'chronic thrombo-embolic pulmonary hypertension'[tw] OR chronic thrombo-embolic pulmonary hypertens\*[tw] OR chronic major vessel thromboembolic pulmonary hypertens\*[tw] OR 'chronic thromboembolic PH'[tw] OR 'chronic thrombo-embolic PH'[tw] OR 'chronic thromboembolic hypertension'[tw] OR 'chronic thrombo-embolic hypertension'[tw] OR ('chronic'[tw] AND (thromboembolic pulmonary hypertens\*[tw] OR thrombo-embolic pulmonary hypertens\*[tw])) OR (('chronic'[ti] AND (thromboembol\*[ti] OR thrombo-embol\*[ti]) AND pulmonary hypertens\*[ti])) OR (('Chronic Disease'[mesh] AND 'Hypertension, Pulmonary'[mesh] AND 'Pulmonary Embolism'[mesh])) OR (('chronic'[tw] AND (thromboembol\*[tw] OR thrombo-embol\*[tw]) AND pulmonary hypertens\*[tw])) OR ('Hypertension, Pulmonary'[mesh] AND 'Pulmonary Embolism'[mesh] AND 'Thromboembolism'[mesh]) OR (('Hypertension, Pulmonary'[majr] AND 'Pulmonary Embolism'[mesh]) OR ('Hypertension, Pulmonary'[mesh] AND 'Pulmonary Embolism'[majr])) AND ('Incidence'[Mesh] OR 'incidence'[tw] OR incidence\*[tw] OR 'Epidemiology'[Mesh] OR 'epidemiology'[Subheading] OR 'Risk Factors'[Mesh] OR 'Risk'[mesh] OR 'clinical profile'[tw] OR 'clinical profiles'[tw])

### MEDLINE

('CTEPH'.mp OR 'chronic thromboembolic pulmonary hypertension'.mp OR chronic thromboembolic pulmonary hypertens\*.mp OR 'chronic thromboembolic pulmonary arterial hypertension'.mp OR 'chronic thrombo-embolic pulmonary hypertension'.mp OR chronic thrombo-embolic pulmonary hypertens\*.mp OR chronic major vessel thromboembolic pulmonary hypertens\*.mp OR 'chronic thromboembolic PH'.mp OR 'chronic thrombo-embolic PH'.mp OR 'chronic thromboembolic hypertension'.mp OR 'chronic thrombo-embolic hypertension'.mp OR ('chronic'.mp AND

(thromboembolic pulmonary hypertens\*.mp OR thrombo-embolic pulmonary hypertens\*.mp)) OR  
 (('chronic'.ti AND (thromboembol\*.ti OR thrombo-embol\*.ti) AND pulmonary hypertens\*.ti)) OR  
 ((exp 'Chronic Disease'/ AND exp 'Hypertension, Pulmonary'/ AND exp 'Pulmonary Embolism'/)) OR  
 (('chronic'.mp AND (thromboembol\*.mp OR thrombo-embol\*.mp) AND pulmonary hypertens\*.mp))  
 OR (exp 'Hypertension, Pulmonary'/ AND exp 'Pulmonary Embolism'/ AND exp  
 'Thromboembolism'/) OR ((exp '\*Hypertension, Pulmonary'/ AND exp 'Pulmonary Embolism'/) OR  
 (exp 'Hypertension, Pulmonary'/ AND exp '\*Pulmonary Embolism'/))) AND (exp 'Incidence'/ OR  
 'incidence'.mp OR incidence\*.mp OR exp 'Epidemiology'/ OR 'ep'.fs OR exp 'Risk Factors'/ OR exp  
 'Risk'/ OR 'clinical profile'.mp OR 'clinical profiles'.mp)

#### Embase

('chronic thromboembolic pulmonary hypertension'/ep) OR (('chronic thromboembolic pulmonary  
 hypertension'/ OR 'CTEPH'.mp OR 'chronic thromboembolic pulmonary hypertension'.mp OR  
 chronic thromboembolic pulmonary hypertens\*.mp OR 'chronic thromboembolic pulmonary arterial  
 hypertension'.mp OR 'chronic thrombo-embolic pulmonary hypertension'.mp OR chronic thrombo-  
 embolic pulmonary hypertens\*.mp OR chronic major vessel thromboembolic pulmonary  
 hypertens\*.mp OR 'chronic thromboembolic PH'.mp OR 'chronic thrombo-embolic PH'.mp OR  
 'chronic thromboembolic hypertension'.mp OR 'chronic thrombo-embolic hypertension'.mp OR  
 ('chronic'.ti AND (thromboembolic pulmonary hypertens\*.ti OR thrombo-embolic pulmonary  
 hypertens\*.ti)) OR (('chronic'.ti AND (thromboembol\*.ti OR thrombo-embol\*.ti) AND pulmonary  
 hypertens\*.ti)) OR ((exp '\*Chronic Disease'/ AND exp '\*Pulmonary Hypertension'/ AND exp '\*Lung  
 Embolism'/)) OR (('chronic'.ti AND (thromboembol\*.ti OR thrombo-embol\*.ti) AND pulmonary  
 hypertens\*.ti)) OR (exp '\*Pulmonary Hypertension'/ AND exp '\*Lung Embolism'/ AND exp  
 '\*Thromboembolism'/) OR ((exp '\*Pulmonary Hypertension'/ AND exp '\*Lung Embolism'/) OR (exp  
 '\*Pulmonary Hypertension'/ AND exp '\*Lung Embolism'/))) AND (exp 'Incidence'/ OR 'incidence'.mp

OR incidence\*.mp OR 'Epidemiology'/ OR exp 'Risk Factor'/ OR exp 'Risk'/ OR 'clinical profile'.mp OR 'clinical profiles'.mp))

#### Web of Science

(TS=('chronic thromboembolic pulmonary hypertension' OR 'CTEPH' OR 'chronic thromboembolic pulmonary hypertension' OR chronic thromboembolic pulmonary hypertens\* OR 'chronic thromboembolic pulmonary arterial hypertension' OR 'chronic thrombo-embolic pulmonary hypertension' OR chronic thrombo-embolic pulmonary hypertens\* OR chronic major vessel thromboembolic pulmonary hypertens\* OR 'chronic thromboembolic PH' OR 'chronic thrombo-embolic PH' OR 'chronic thromboembolic hypertension' OR 'chronic thrombo-embolic hypertension') OR TI=('chronic' AND (thromboembolic pulmonary hypertens\* OR thrombo-embolic pulmonary hypertens\*)) OR TI=((('chronic' AND (thromboembol\* OR thrombo-embol\*) AND pulmonary hypertens\*)) OR TI=((('Chronic Disease' AND 'Pulmonary Hypertension' AND 'Lung Embolism')) OR TI=((('chronic' AND (thromboembol\* OR thrombo-embol\*) AND pulmonary hypertens\*)) OR TI=('Pulmonary Hypertension' AND 'Lung Embolism' AND 'Thromboembolism') OR TI=('Pulmonary Hypertension' AND 'Lung Embolism')) AND TS=('Incidence' OR 'incidence' OR incidence\* OR 'Epidemiology' OR 'Risk Factor' OR 'Risk' OR 'clinical profile' OR 'clinical profiles')

#### Cochrane library

((('chronic thromboembolic pulmonary hypertension' OR 'CTEPH' OR 'chronic thromboembolic pulmonary hypertension' OR chronic thromboembolic pulmonary hypertens\* OR 'chronic thromboembolic pulmonary arterial hypertension' OR 'chronic thrombo-embolic pulmonary hypertension' OR chronic thrombo-embolic pulmonary hypertens\* OR chronic major vessel thromboembolic pulmonary hypertens\* OR 'chronic thromboembolic PH' OR 'chronic thrombo-embolic PH' OR 'chronic thromboembolic hypertension' OR 'chronic thrombo-embolic hypertension') OR ('chronic' AND (thromboembolic pulmonary hypertens\* OR thrombo-embolic

pulmonary hypertens\*)) OR (('chronic' AND (thromboembol\* OR thrombo-embol\*) AND pulmonary hypertens\*)) OR (('Chronic Disease' AND 'Pulmonary Hypertension' AND 'Lung Embolism')) OR (('chronic' AND (thromboembol\* OR thrombo-embol\*) AND pulmonary hypertens\*)) OR ('Pulmonary Hypertension' AND 'Lung Embolism' AND 'Thromboembolism') OR ('Pulmonary Hypertension' AND 'Lung Embolism')) AND ('Incidence' OR 'incidence' OR incidence\* OR 'Epidemiology' OR 'Risk Factor' OR 'Risk' OR 'clinical profile' OR 'clinical profiles')

#### CINAHL

(('chronic thromboembolic pulmonary hypertension' OR 'CTEPH' OR 'chronic thromboembolic pulmonary hypertension' OR chronic thromboembolic pulmonary hypertens\* OR 'chronic thromboembolic pulmonary arterial hypertension' OR 'chronic thrombo-embolic pulmonary hypertension' OR chronic thrombo-embolic pulmonary hypertens\* OR chronic major vessel thromboembolic pulmonary hypertens\* OR 'chronic thromboembolic PH' OR 'chronic thrombo-embolic PH' OR 'chronic thromboembolic hypertension' OR 'chronic thrombo-embolic hypertension') OR ('chronic' AND (thromboembolic pulmonary hypertens\* OR thrombo-embolic pulmonary hypertens\*)) OR (('chronic' AND (thromboembol\* OR thrombo-embol\*) AND pulmonary hypertens\*)) OR (('Chronic Disease' AND 'Pulmonary Hypertension' AND 'Lung Embolism')) OR (('chronic' AND (thromboembol\* OR thrombo-embol\*) AND pulmonary hypertens\*)) OR ('Pulmonary Hypertension' AND 'Lung Embolism' AND 'Thromboembolism') OR ('Pulmonary Hypertension' AND 'Lung Embolism')) AND ('Incidence' OR 'incidence' OR incidence\* OR 'Epidemiology' OR 'Risk Factor' OR 'Risk' OR 'clinical profile' OR 'clinical profiles')

#### Academic Search Premier

('chronic thromboembolic pulmonary hypertension' OR 'CTEPH' OR 'chronic thromboembolic pulmonary hypertension' OR chronic thromboembolic pulmonary hypertens\* OR 'chronic thromboembolic pulmonary arterial hypertension' OR 'chronic thrombo-embolic pulmonary

hypertension' OR chronic thrombo-embolic pulmonary hypertens\* OR chronic major vessel thromboembolic pulmonary hypertens\* OR 'chronic thromboembolic PH' OR 'chronic thrombo-embolic PH' OR 'chronic thromboembolic hypertension' OR 'chronic thrombo-embolic hypertension') AND ('Incidence' OR 'incidence' OR incidence\* OR 'Epidemiology' OR 'Risk Factor' OR 'Risk' OR 'clinical profile' OR 'clinical profiles')

ScienceDirect

TITLE-ABSTR-KEY(('chronic thromboembolic pulmonary hypertension' OR 'CTEPH' OR 'chronic thromboembolic pulmonary hypertension' OR chronic thromboembolic pulmonary hypertens\* OR 'chronic thromboembolic pulmonary arterial hypertension' OR 'chronic thrombo-embolic pulmonary hypertension' OR chronic thrombo-embolic pulmonary hypertens\* OR chronic major vessel thromboembolic pulmonary hypertens\* OR 'chronic thromboembolic PH' OR 'chronic thrombo-embolic PH' OR 'chronic thromboembolic hypertension' OR 'chronic thrombo-embolic hypertension') AND ('Incidence' OR 'incidence' OR incidence\* OR 'Risk Factor' OR 'risk factors' OR 'clinical profile' OR 'clinical profiles'))
